# Supplementary material for: An internal charge transfer-DNA platform for fluorescence sensing of divalent metal ions
Source: Royal Society of Chemistry journal article supplement (doi:10.1039/c6cc04613d), 2016-01-01
Supplement: c6cc04613d1.pdf [file c6cc04613d1.pdf]

**Supporting Information for:**

**An internal charge transfer-DNA platform for fluorescence sensing of divalent metal ions**

*Darian J.M. Blanchard and Richard A. Manderville\**

Table of Contents

1. Fig S1. Positional-dependent emission intensity and wavelength S2

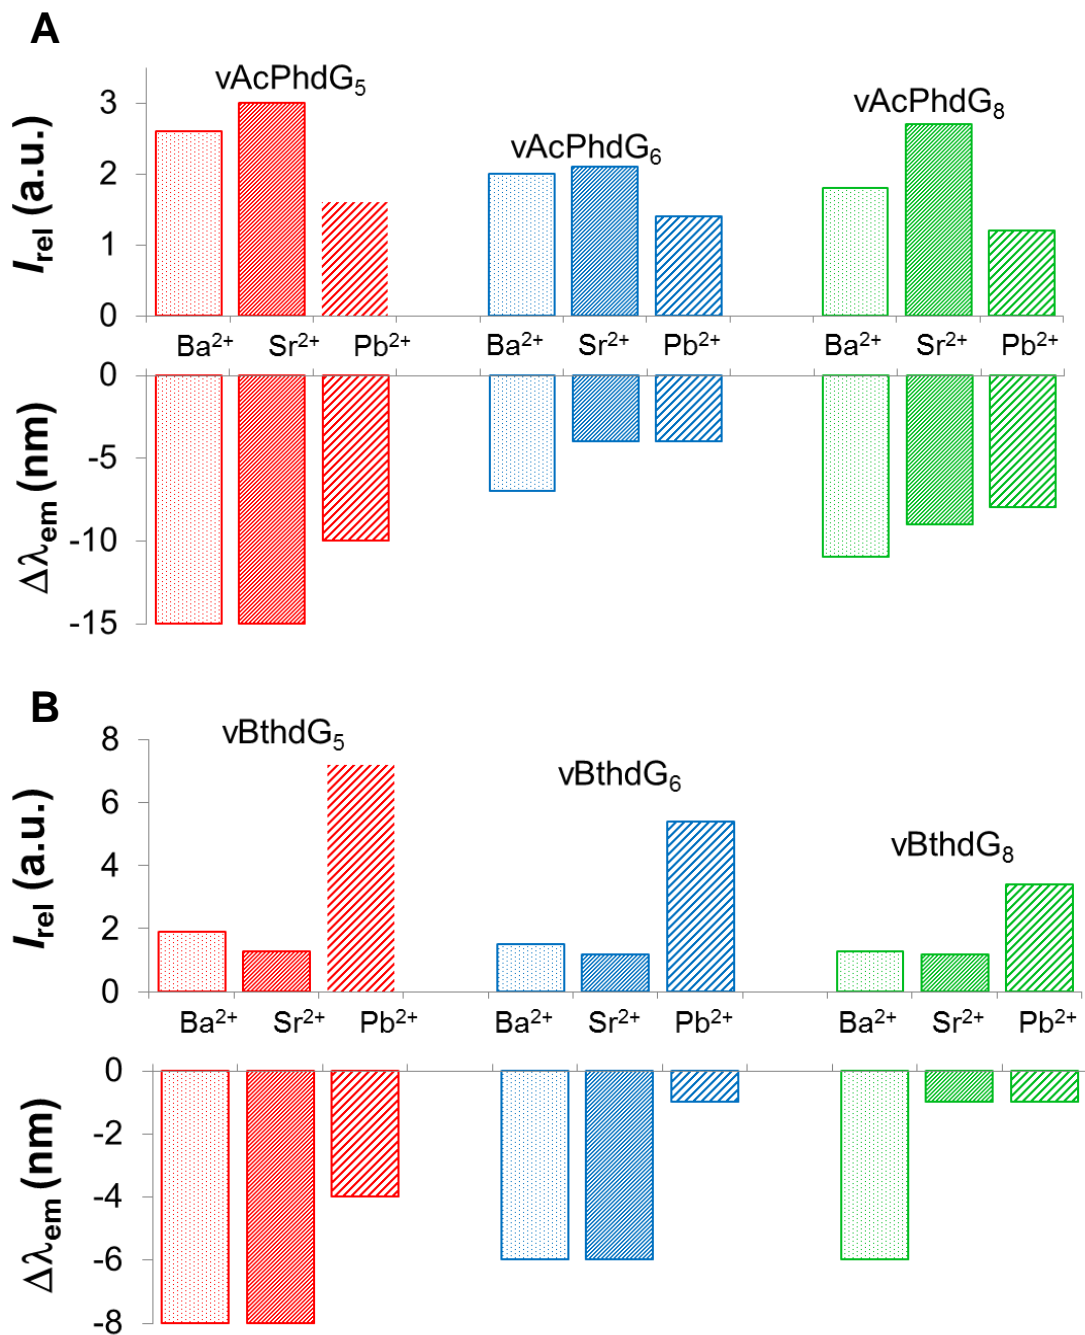

**Fig. S1.** Positional-dependent (G<sub>5</sub> vs G<sub>6</sub> vs. G<sub>8</sub>) emission intensity ( $I_{rel}$ ) and emission wavelength ( $\Delta\lambda_{em}$ ) values in aqueous buffer at 10 °C. (A) vAcPhdG;  $I_{rel} = (I_{divalent\ metal}/I_{K^+})$  and  $\Delta\lambda_{em} = (\lambda_{em(divalent\ metal)} - \lambda_{em(K^+)})$ , (B) vBthdG;  $I_{rel} = (I_{K^+}/I_{divalent\ metal})$  and  $\Delta\lambda_{em} = (\lambda_{em(divalent\ metal)} - \lambda_{em(K^+)})$ .
